# Supplementary material
Source: Springer Nature journal article supplement (https://www.springermedizin.de/resource/supplementary/12960_2008_152_MOESM2_ESM.pdf/9570522)
Supplement: MOESM2 [file 9570522]

Postgraduate Certificate in Public Health: 57% [N=234]

Postgraduate Diploma in Public Health: 72% [N=260]

Masters in Public Health: 57% [N=120]

N = Total number of students registered 2000–2007 who could have completed within this time period.

\* Total completion rate is calculated as a proportion of students who complete the qualification within this time period relative to the number of registered students who can be expected to graduate in the same period. This includes those who studied full-time in 2007.
